# Supplementary material for: 3D assimilation and radiative impact assessment of aerosol black carbon over the Indian region using aircraft, balloon, ground-based, and multi-satellite observations
Source: Copernicus journal article supplement (doi:10.5194/egusphere-2023-499), 2023-05-15
Supplement: Supplementary file 1 [file egusphere-2023-499-supplement.pdf]

## Supplement of

# 3D assimilation and radiative impact assessment of aerosol black carbon over the Indian region using aircraft, balloon, ground-based, and multi-satellite observations

5 Nair K. Kala<sup>1,2</sup>, Narayana Sarma Anand<sup>3</sup>, Mohanan R. Manoj<sup>2</sup>, Srinivasan Prasanth<sup>2</sup>, Harshavardhana S. Pathak<sup>2</sup>, Thara Prabhakaran<sup>4</sup>, Pramod D. Safai<sup>4</sup>, Krishnaswamy K. Moorthy<sup>2</sup> and Sreedharan K. Satheesh<sup>1,2,5</sup>

<sup>1</sup>Centre for Atmospheric and Oceanic Sciences, Indian Institute of Science, Bengaluru, Karnataka, India

<sup>2</sup>Divecha Centre for Climate Change, Indian Institute of Science, Bengaluru, Karnataka, India

<sup>3</sup>School of Physics, Indian Institute of Science Education and Research Thiruvananthapuram, Kerala, India

10 <sup>4</sup>Indian Institute of Tropical Meteorology (IITM), Ministry of Earth Sciences, Pune, Maharashtra, India

<sup>5</sup>DST-Centre of Excellence in Climate Change, Indian Institute of Science, Bengaluru, Karnataka, India

Correspondence: Nair K. Kala ([kalanair56@gmail.com](mailto:kalanair56@gmail.com))

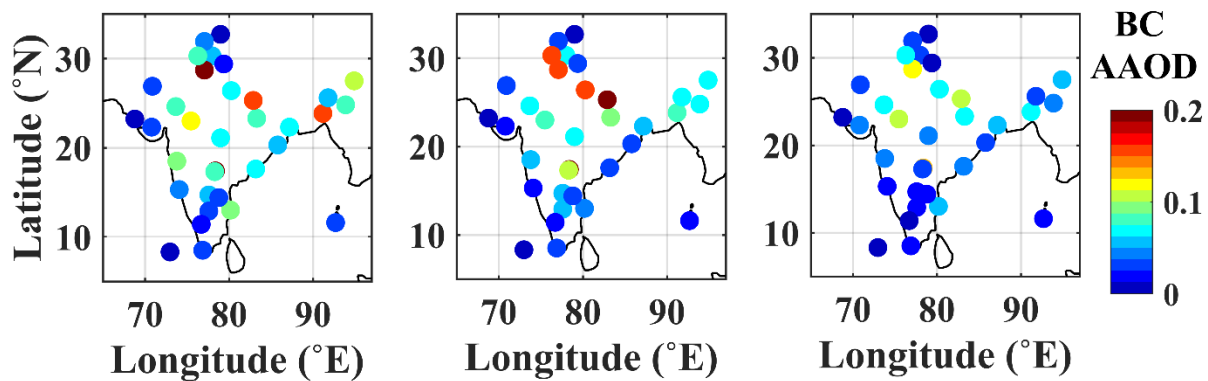

15 **Figure S1.** Variation of BC AAOD at the ARFINET measurement sites for (a) DJF, (b) MAM, and (c) ON seasons.

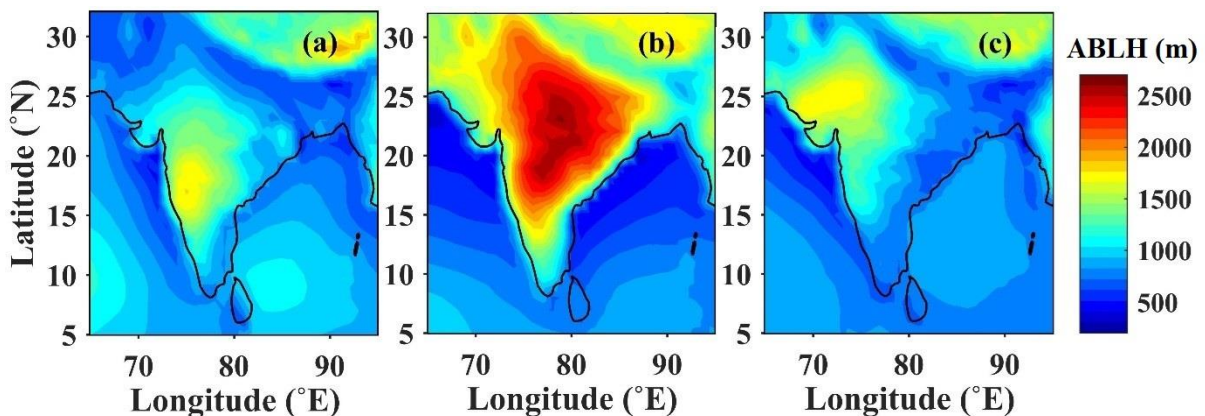

**Figure S2.** Seasonal mean atmospheric boundary layer height (ABLH) from MERRA-2 reanalysis for (a) DJF, (b) MAM, and (c) ON seasons.

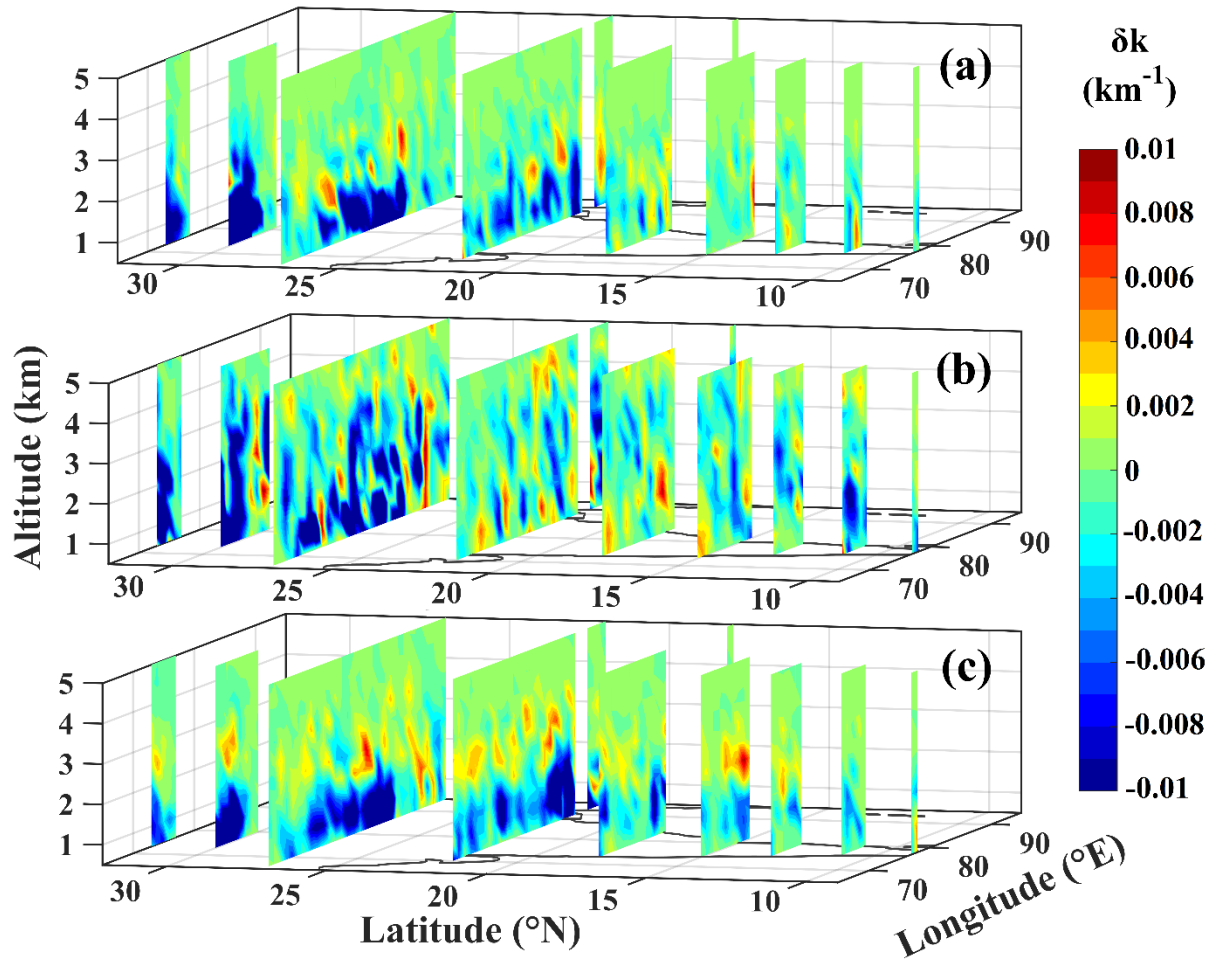

20

**Figure S3.** Variation in  $\delta k$  during (a) DJF, (b) MAM, and (c) ON seasons.

**Table S1.** Essential details of the ARFINET stations.

| Sl. No. | Station name | Station code | Latitude ( $^{\circ}\text{N}$ ) | Longitude ( $^{\circ}\text{E}$ ) | Altitude (m amsl) |
|---------|--------------|--------------|---------------------------------|----------------------------------|-------------------|
| 1       | Agartala     | AGR          | 91.2                            | 23.8                             | 13                |
| 2       | Ahmedabad    | AMD          | 23                              | 75.5                             | 53                |
| 3       | Anantapur    | ATP          | 14.7                            | 77.6                             | 335               |
| 4       | Bhubaneswar  | BBR          | 20.3                            | 85.8                             | 58                |
| 5       | Bengaluru    | BLR          | 12.9                            | 85.8                             | 920               |
| 6       | Chennai      | CHN          | 13                              | 80.2                             | 6                 |
| 7       | Dibrugarh    | DBR          | 27.5                            | 94.9                             | 108               |
| 8       | Dehradun     | DDN          | 30.3                            | 78                               | 640               |
| 9       | Delhi        | DEL          | 28.7                            | 77.1                             | 300               |

|    |                      |     |      |      |      |
|----|----------------------|-----|------|------|------|
| 10 | Goa                  | GOA | 15.3 | 74.1 | 8    |
| 11 | Hyderabad (urban)    | HDN | 17.4 | 78.4 | 542  |
| 12 | Hyderabad (suburban) | HDT | 17.3 | 78.3 | 542  |
| 13 | Hanle                | HNL | 32.7 | 79   | 4500 |
| 14 | Imphal               | IPH | 24.8 | 93.9 | 786  |
| 15 | Jaisalmer            | JSL | 26.9 | 70.9 | 225  |
| 16 | Kadappa              | KDP | 14.4 | 78.8 | 138  |
| 17 | Kharagpur            | KGP | 22.3 | 87.2 | 61   |
| 18 | Kanpur               | KNP | 26.4 | 80.3 | 126  |
| 19 | Kullu                | KLU | 31.9 | 77.1 | 1279 |
| 20 | Naliya               | NAL | 23.2 | 68.6 | 26   |
| 21 | Nagpur               | NGP | 21.1 | 79   | 310  |
| 22 | Nainital             | NTL | 29.4 | 79.4 | 2084 |
| 23 | Ooty                 | OTY | 11.4 | 76.7 | 2240 |
| 24 | Patiala              | PTL | 30.3 | 76.3 | 257  |
| 25 | Pune                 | PUN | 18.5 | 73.8 | 560  |
| 26 | Rajkot               | RKT | 22.3 | 70.8 | 134  |
| 27 | Ranchi               | RNC | 23.3 | 83.3 | 651  |
| 28 | Shillong             | SHN | 25.6 | 91.8 | 1525 |
| 29 | Thiruvananthapuram   | TVM | 8.5  | 76.9 | 10   |
| 30 | Udaipur              | UDP | 24.6 | 73.7 | 423  |
| 31 | Varanasi             | VNS | 25.3 | 82.9 | 81   |
| 32 | Vishakhapatnam       | VSK | 17.6 | 83.2 | 45   |
